# Supplementary material for: Modelling ocean wave conditions at a shallow coast under scarce data availability – A case study at the western coast of the Mekong Delta, Vietnam
Source: Copernicus journal article supplement (doi:10.5194/egusphere-2022-1447), 2023-01-12

1 **Supplementary Materials (SM)**

2

3 **SM1: a) Input parameter features ind SwanOne, b) The bathymetry profile and respective location of the wave sensors.**  
4 **Example from transect 2.**

a) Input parameters

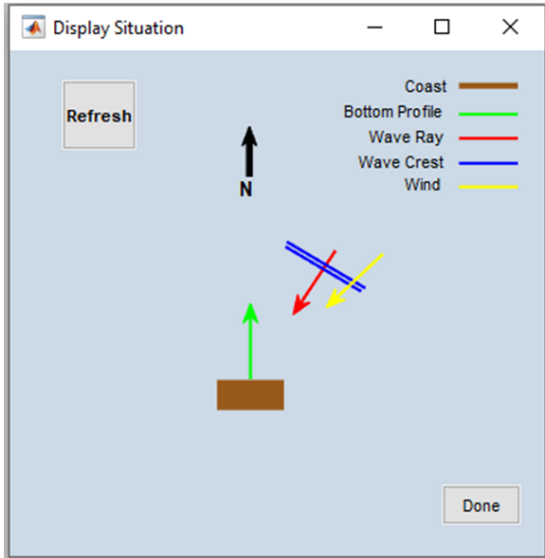

5

6

b) Bathymetry profile and output locations at Transect 2

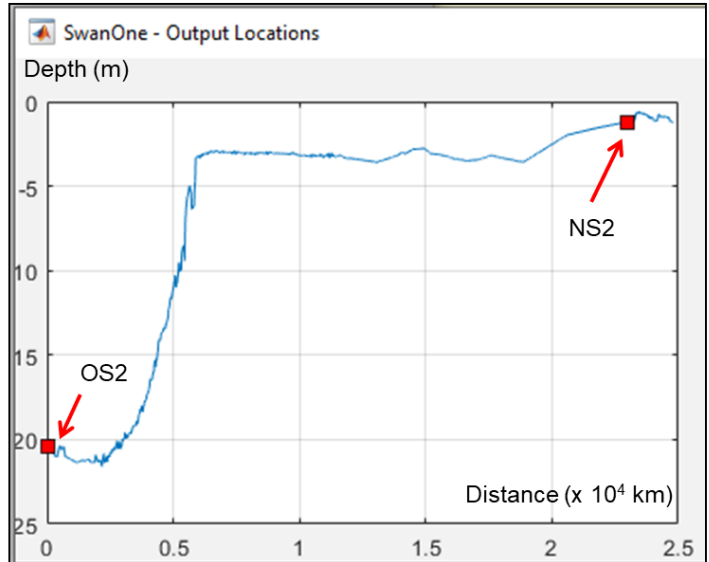

**SM2: Iterative increase of 2D model accuracy, list of applies grid refinement and model adaptations to the boundary conditions.**

| Iteration | Grid        | Resolution    | Extend               | Adjusting                                                   |
|-----------|-------------|---------------|----------------------|-------------------------------------------------------------|
| 1         | Regular     | 8 km          | 200km from coast     | New grid                                                    |
| 2         | Regular     | 8 km          | 200km from coast     | Adjusting grid                                              |
| 3         | Regular     | 8 km          | 200km from coast     | Adjusting grid, improve near-shore bathymetry interpolation |
| 4         | Regular     | 8 km          | 200km from coast     | Adjusting grid, improve near-shore bathymetry interpolation |
| 5         | Regular     | 3 km          | 200km from coast     | Finer resolution                                            |
| 6         | Regular     | 3 km          | 200km from coast     | Adjusting grid, improve near-shore bathymetry interpolation |
| 7         | Regular     | 3 km          | 200km from coast     | Adjusting grid, improve near-shore bathymetry interpolation |
| 8         | Regular     | 3 km          | 200km from coast     | Improve near-shore bathymetry interpolation                 |
| 9         | Regular     | 3 km          | 200km from coast     | Adjust bottom roughness                                     |
| 10        | Regular     | 3 km          | 200km from coast     | Adjust bottom roughness                                     |
| 11        | Curvilinear | 0.8 km – 3 km | 120km from coast     | New grid                                                    |
| 12        | Curvilinear | 0.8 km – 3 km | 120km from coast     | Adjusting grid, improve near-shore bathymetry interpolation |
| 13        | Curvilinear | 0.8 km – 3 km | 120km from coast     | Adjusting grid, improve near-shore bathymetry interpolation |
| 14        | Curvilinear | 0.2 km – 2 km | 120km from coast     | New grid, finer resolution                                  |
| 15        | Curvilinear | 0.2 km – 2 km | 120km from coast     | Adjusting grid, improve near-shore bathymetry interpolation |
| 16        | Regular     | 17 km         | 500-600km from coast | New grid, test swell wave                                   |
| 17        | Regular     | 17 km         | 500-600km from coast | Adjusting grid                                              |
| 18        | Regular     | 17 km         | 500-600km from coast | Adjusting grid                                              |
| 19        | Curvilinear | 0.2 km – 2 km | 120km from coast     | Apply the wave boundary from ERA5                           |
| 20        | Curvilinear | 0.2 km – 2 km | 120km from coast     | Bottom roughness, wave breaking coefficient                 |
| 21        | Curvilinear | 0.2 km – 2 km | 120km from coast     | Bottom roughness, wave breaking coefficient                 |

**SM3: Iterative increase of 2D model accuracy, application of coarse rectangular grid**

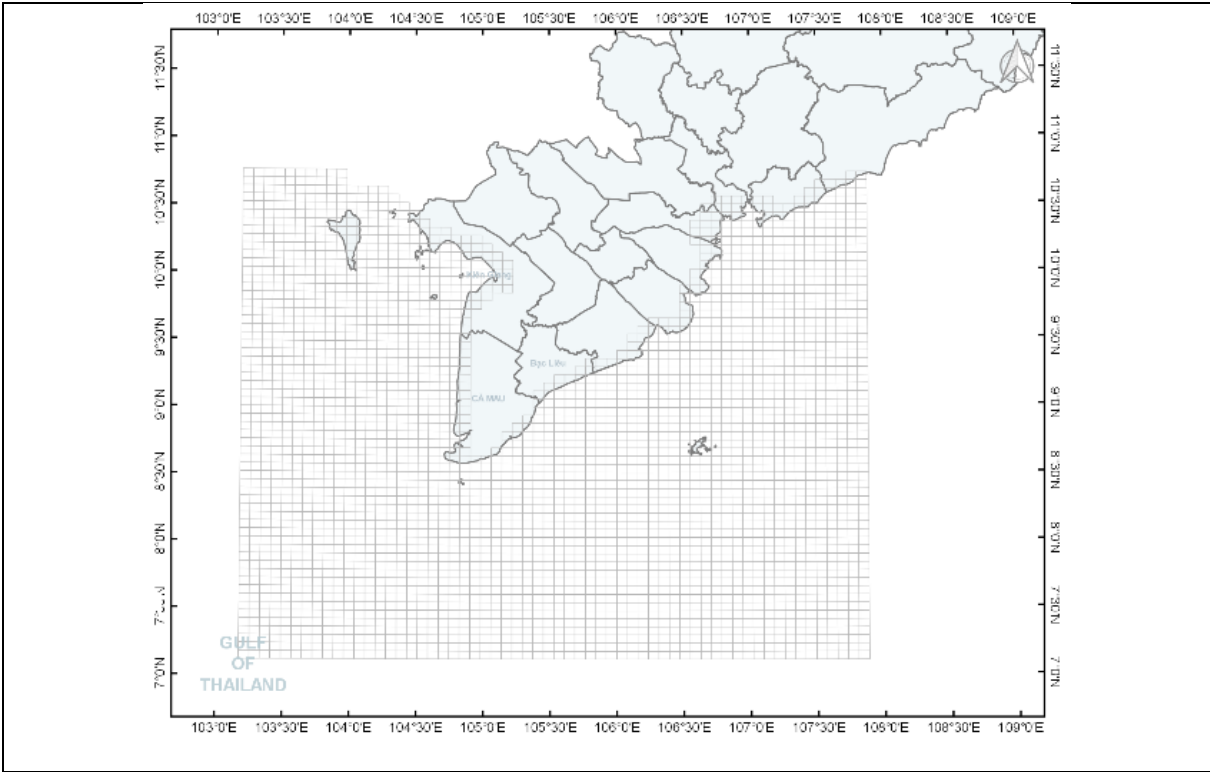

**SM4: Iterative increase of 2D model accuracy, application of fine rectangular grid**

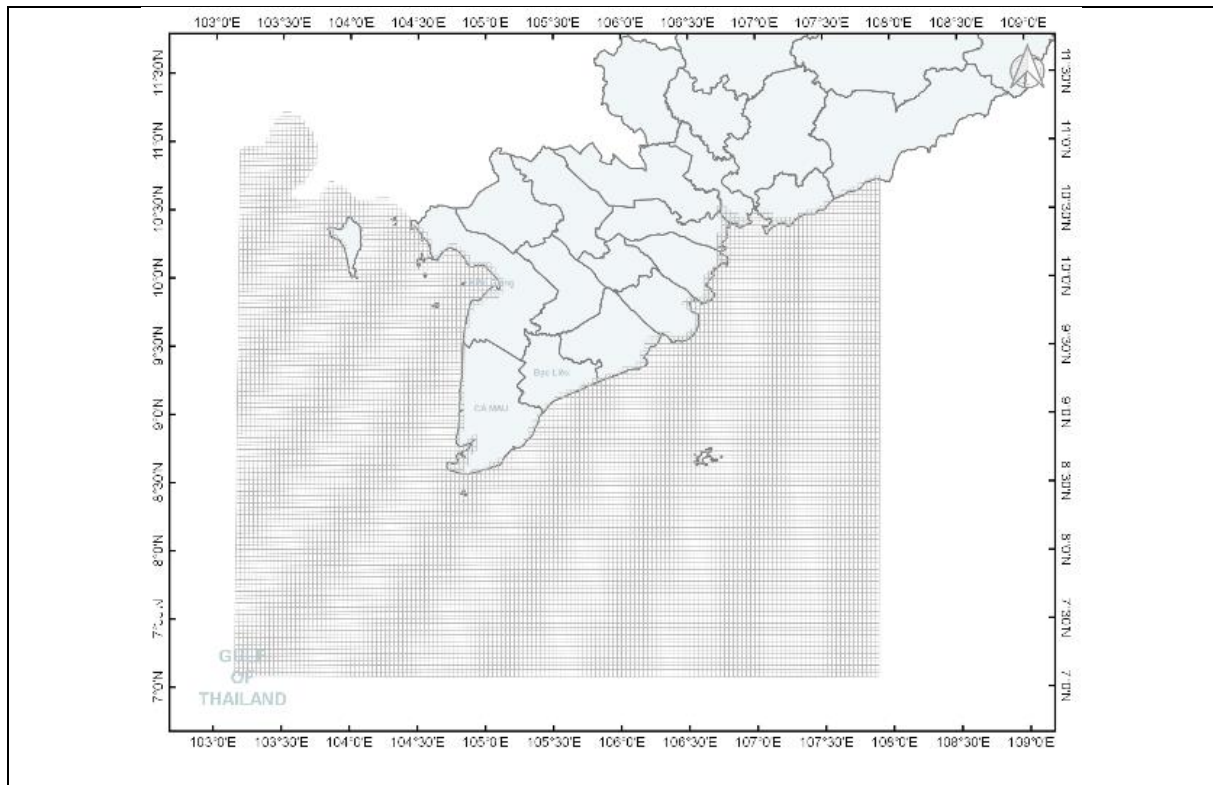

**SM5: Iterative increase of 2D model accuracy, application of coarse curvilinear grid including the boundary areas referring to ERA 5 grid cells.**

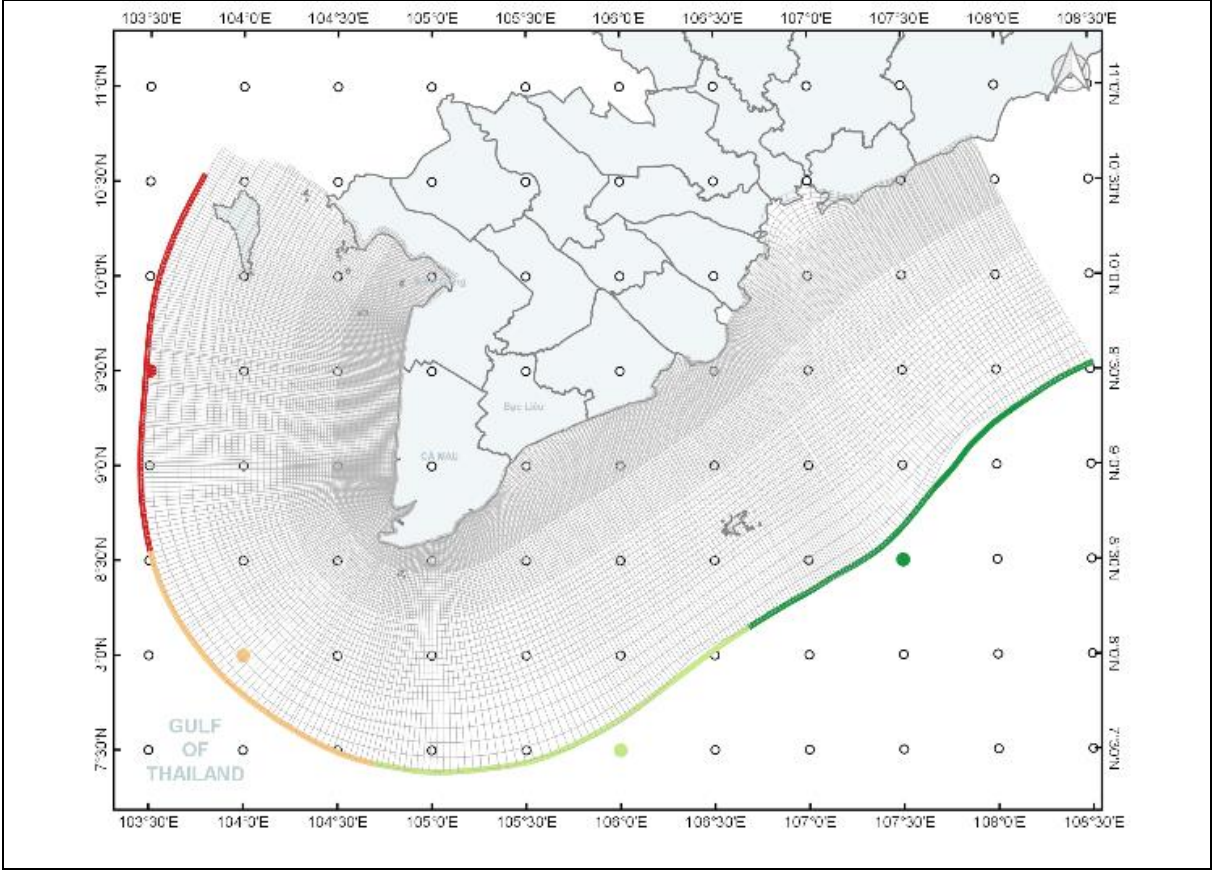

**SM6: Iterative increase of 2D model accuracy, application of fine curvilinear grid including the boundary areas referring to ERA 5 grid cells.**

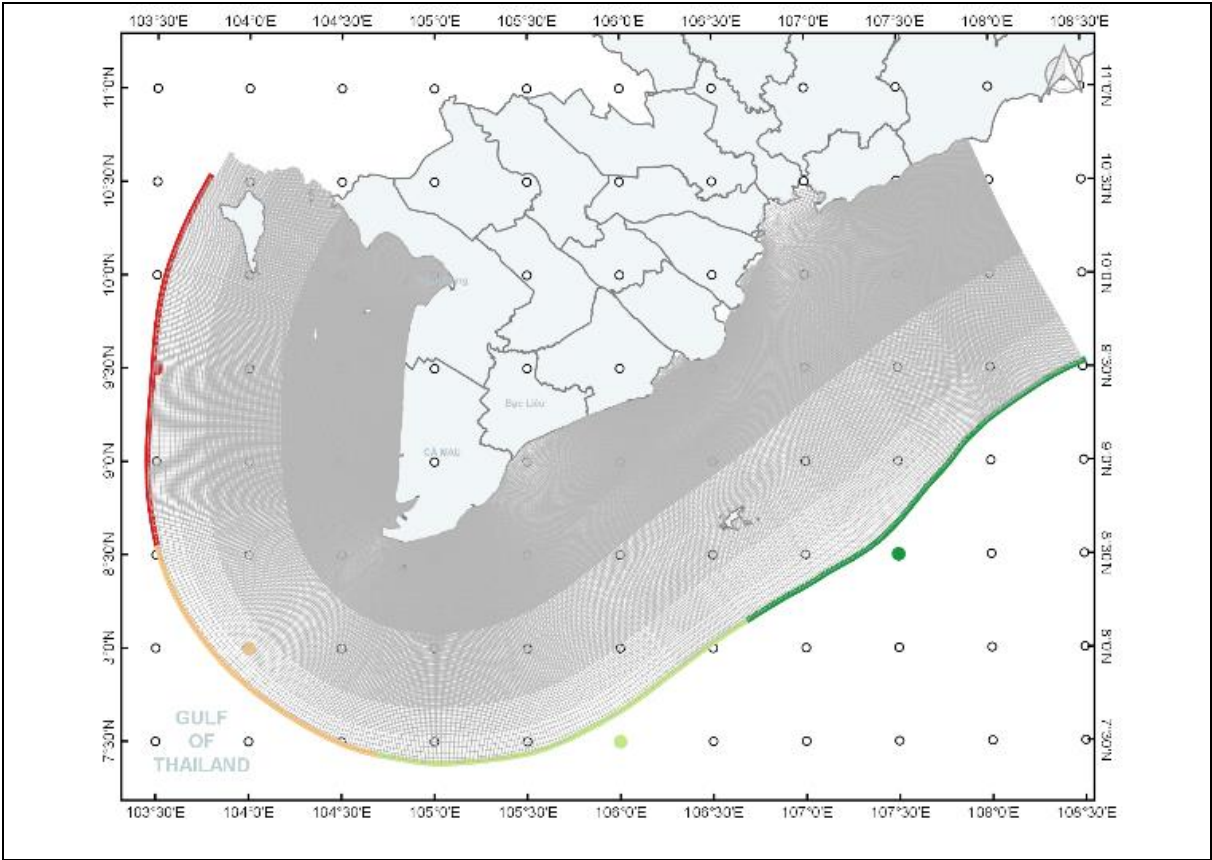

**SM7: Iterative increase of 2D model accuracy, Improving of RMSE of modelled wave heights within the calibration process**

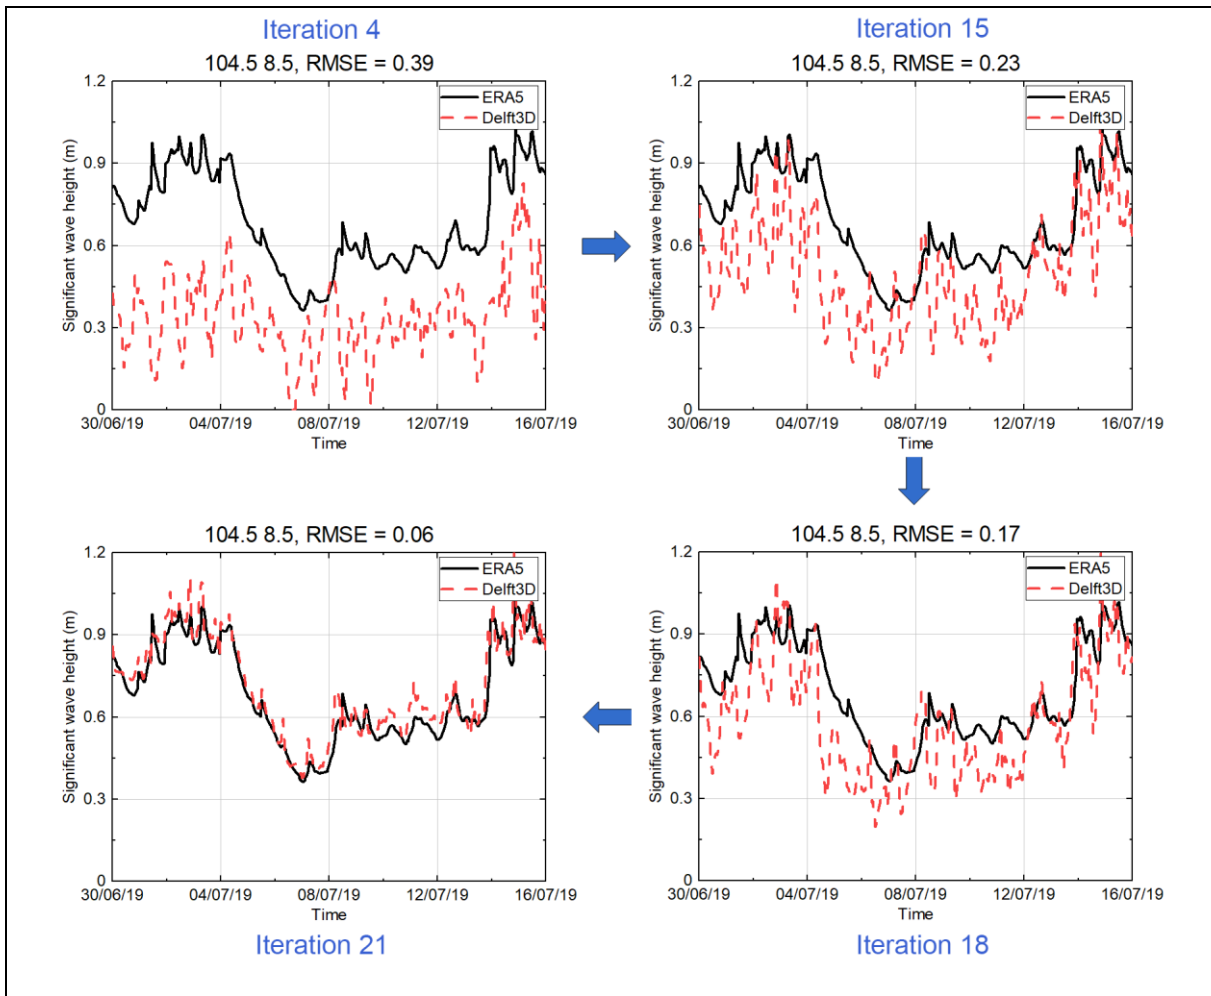

**SM8: Comparison of water depths used for 1D and 2D model extracted at the same location during the storm event (16.8.2000 – 24.08.2000).**

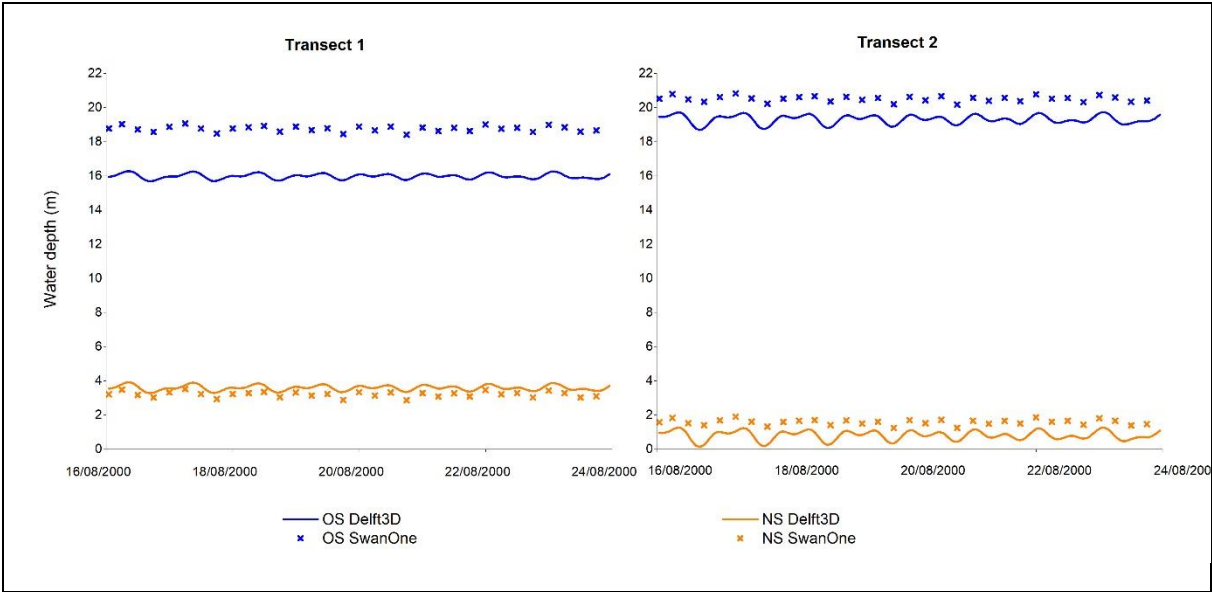



**SM9: Wind surge generated water depth increase at the coastline (point 113 and 118, see Fehler! Verweisquelle konnte nicht gefunden werden.) based on Beaufort scale wind speed input to the spatial model.**

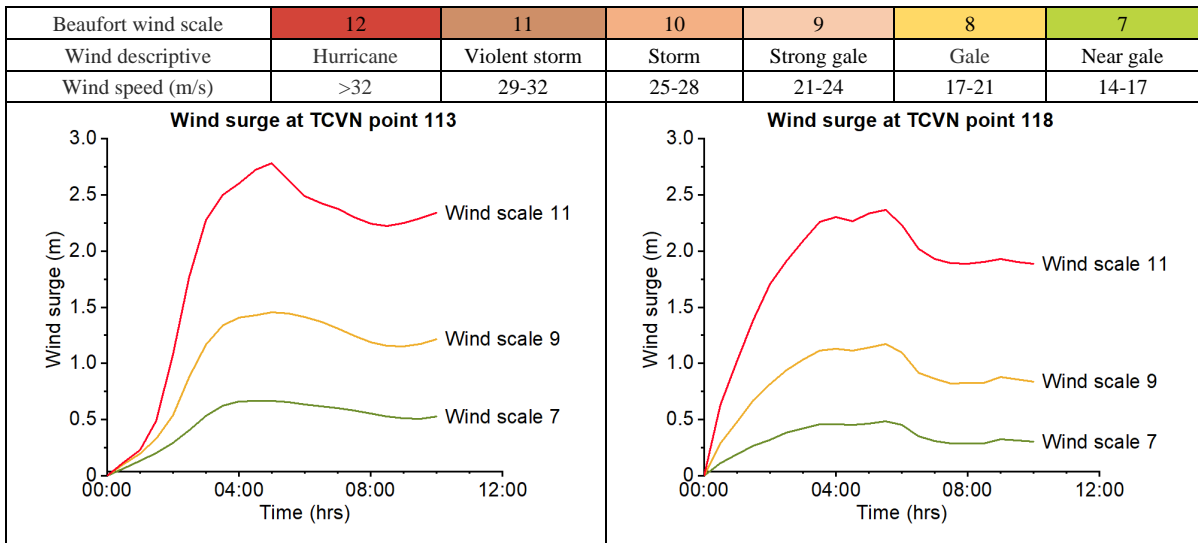

Supplement: Supplementary file 1 [file egusphere-2022-1447-supplement.pdf]
